# Supplementary material for: Identification of castration‐resistant prostate cancer‐related hub genes using weighted gene co‐expression network analysis
Source: PubMed Central journal article supplement (PMC7348158; doi:10.1111/jcmm.15432), 2020-06-02

Sample dendrogram and trait heatmap

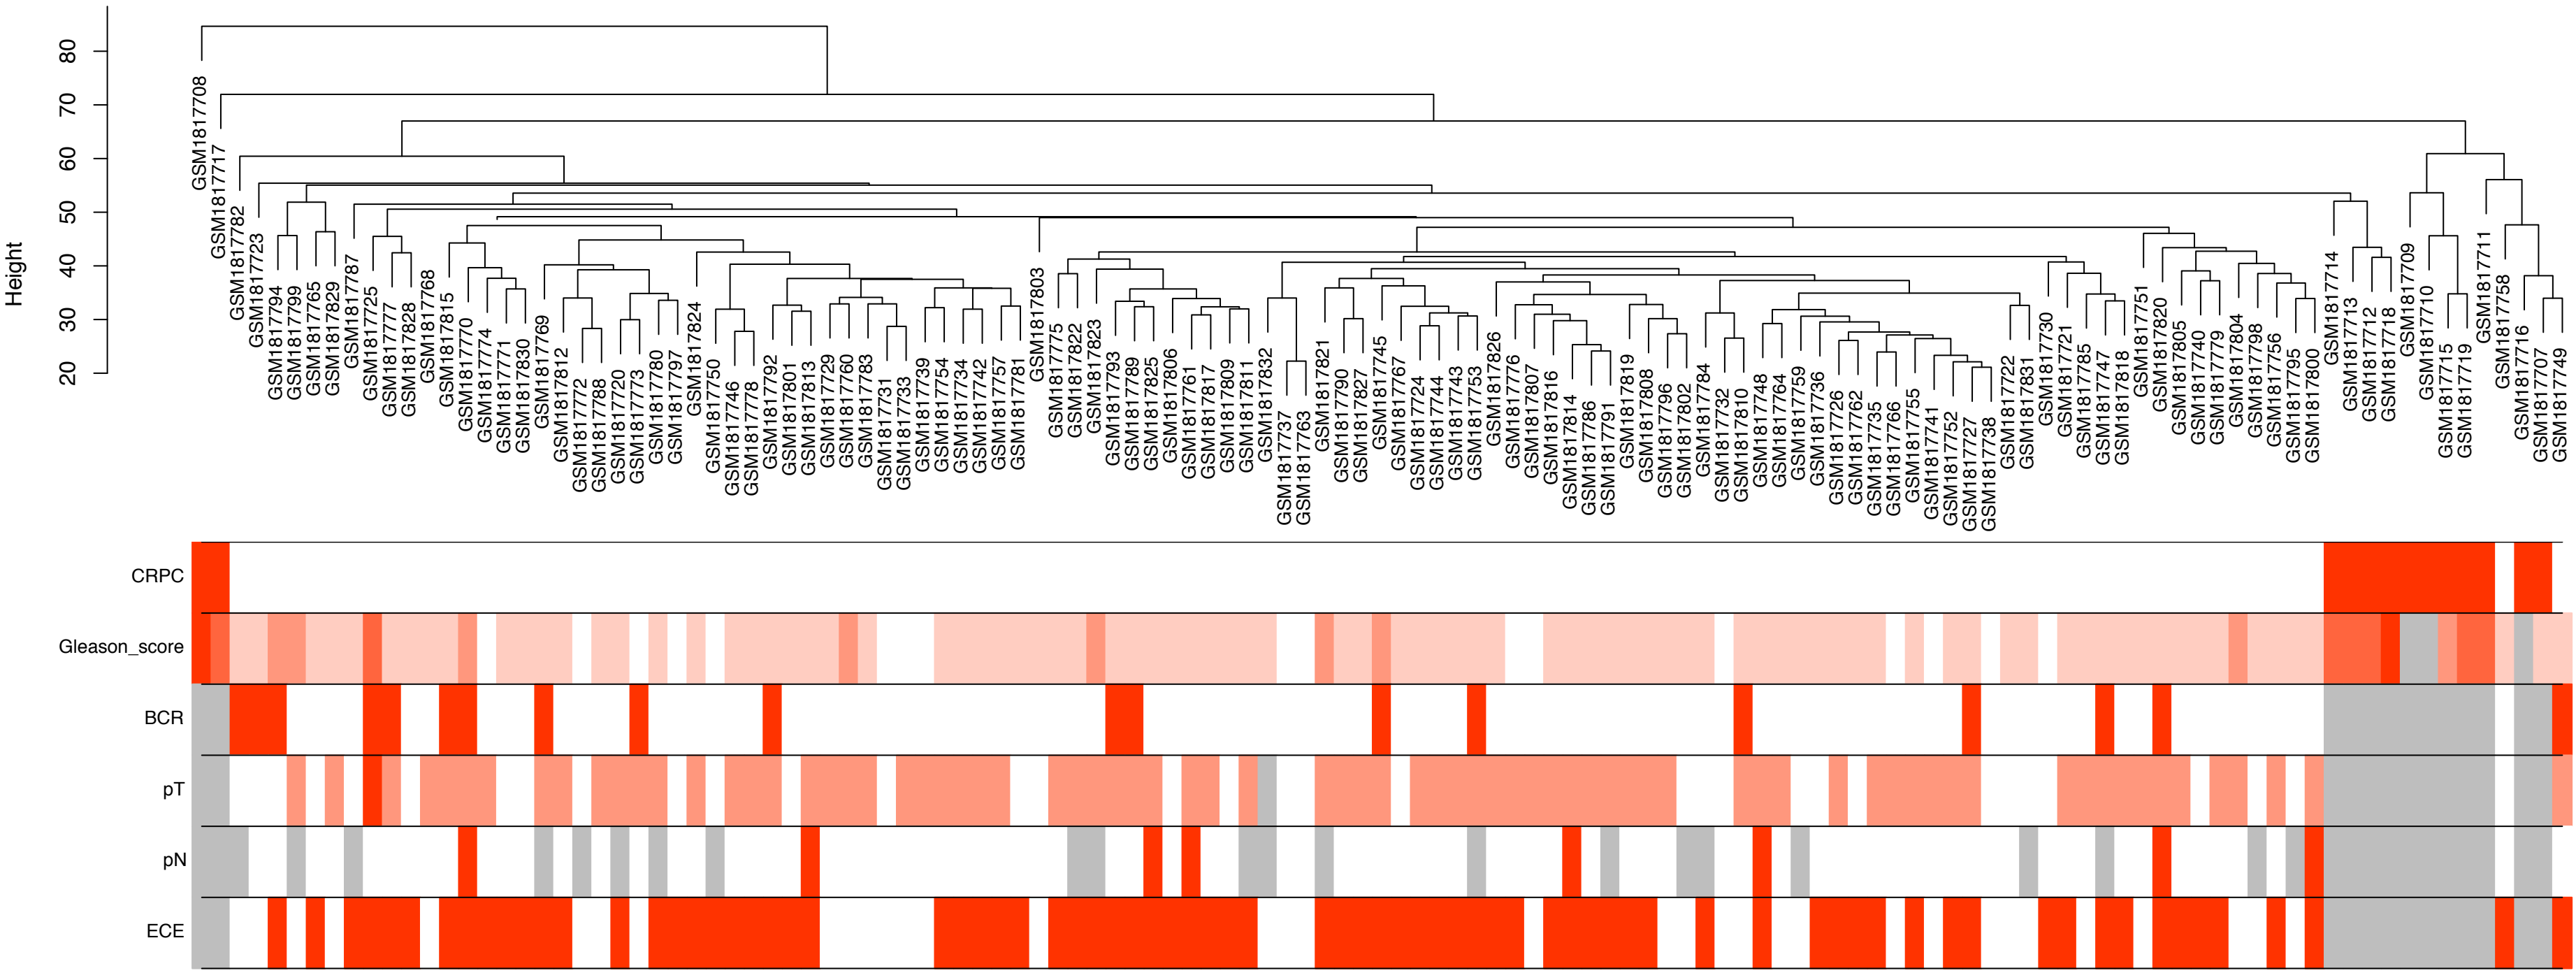

Supplement: JCMM-24-8006-s001.pdf [file JCMM-24-8006-s001.pdf]
