# Supplementary material for: Identification of castration‐resistant prostate cancer‐related hub genes using weighted gene co‐expression network analysis
Source: PubMed Central journal article supplement (PMC7348158; doi:10.1111/jcmm.15432), 2020-06-02

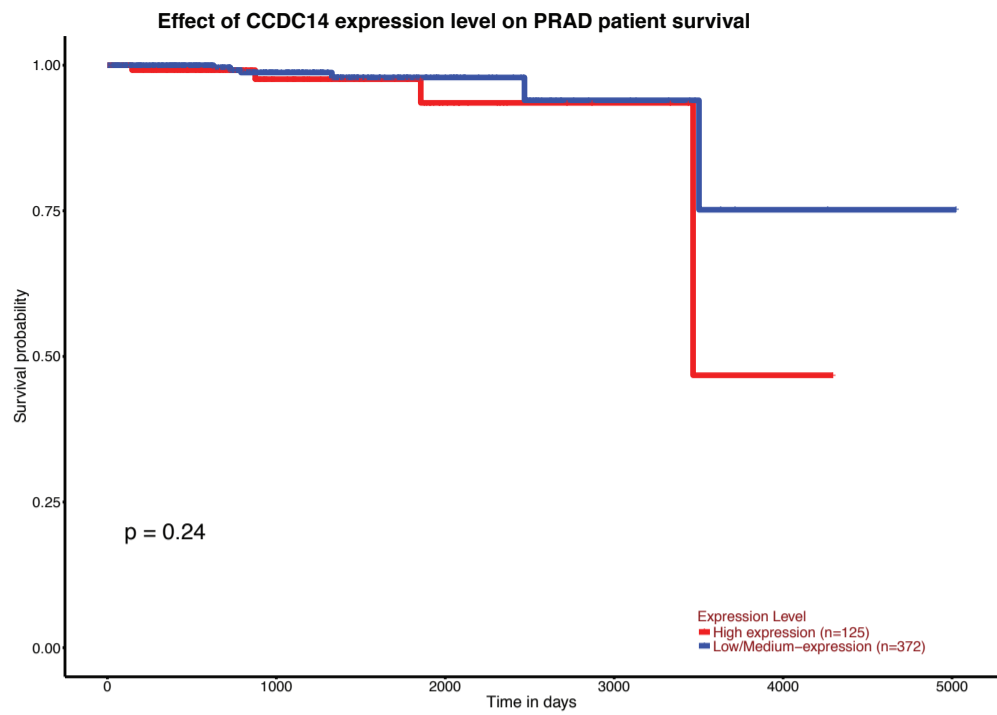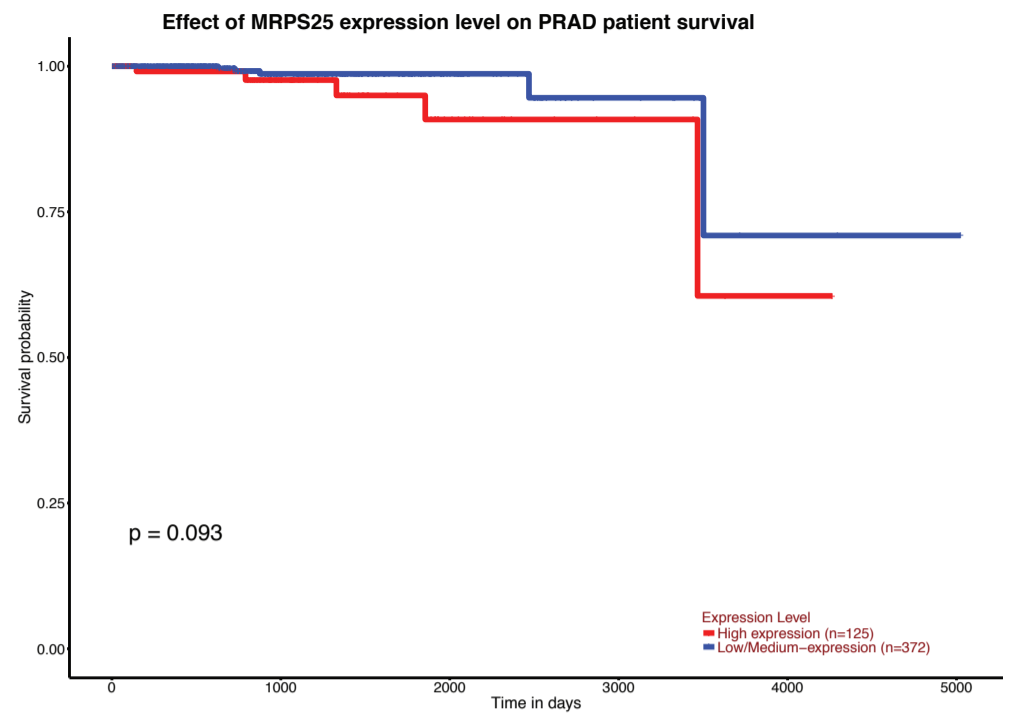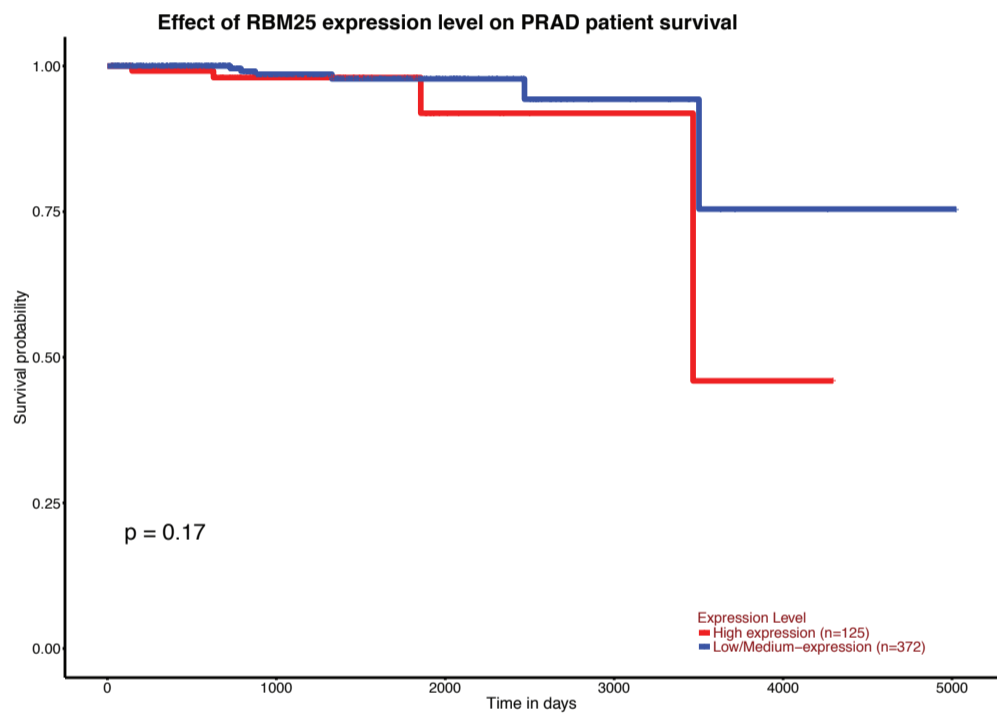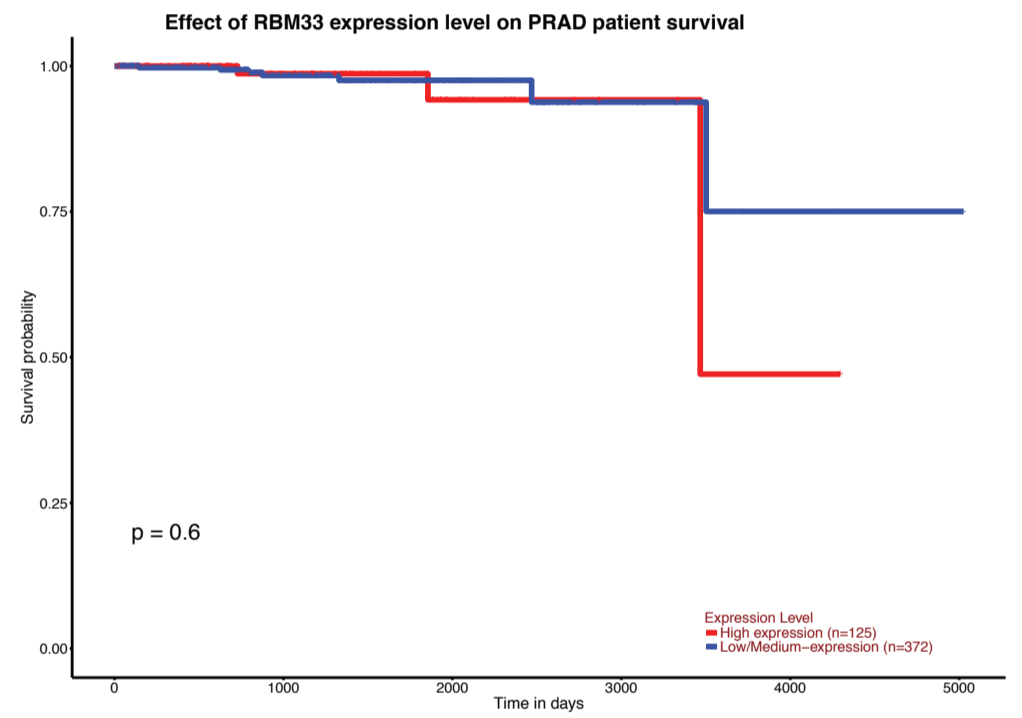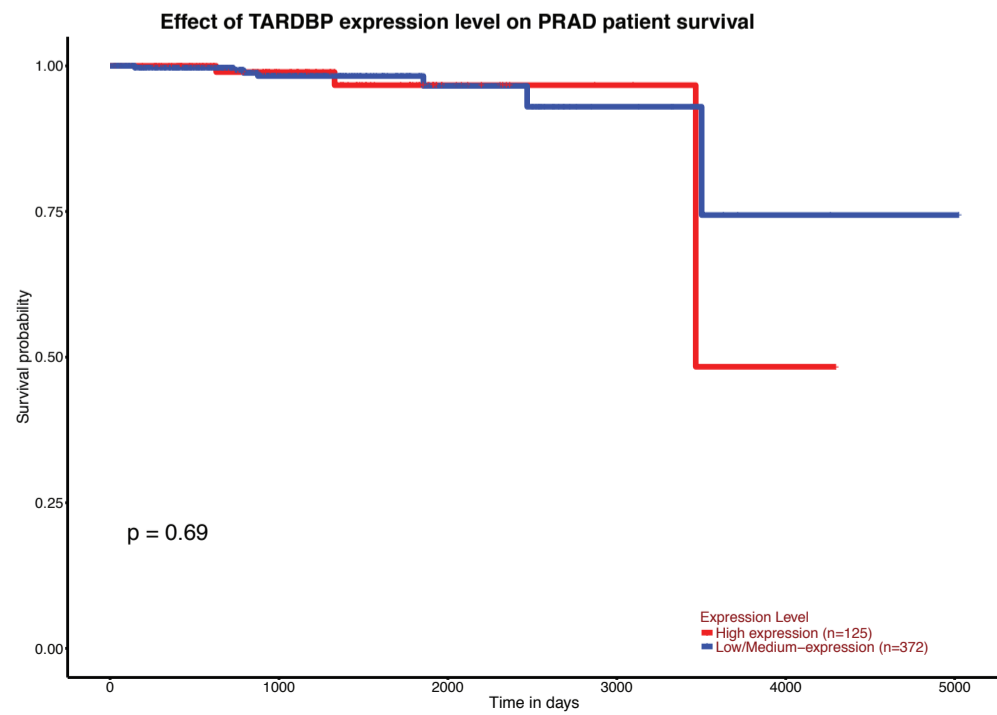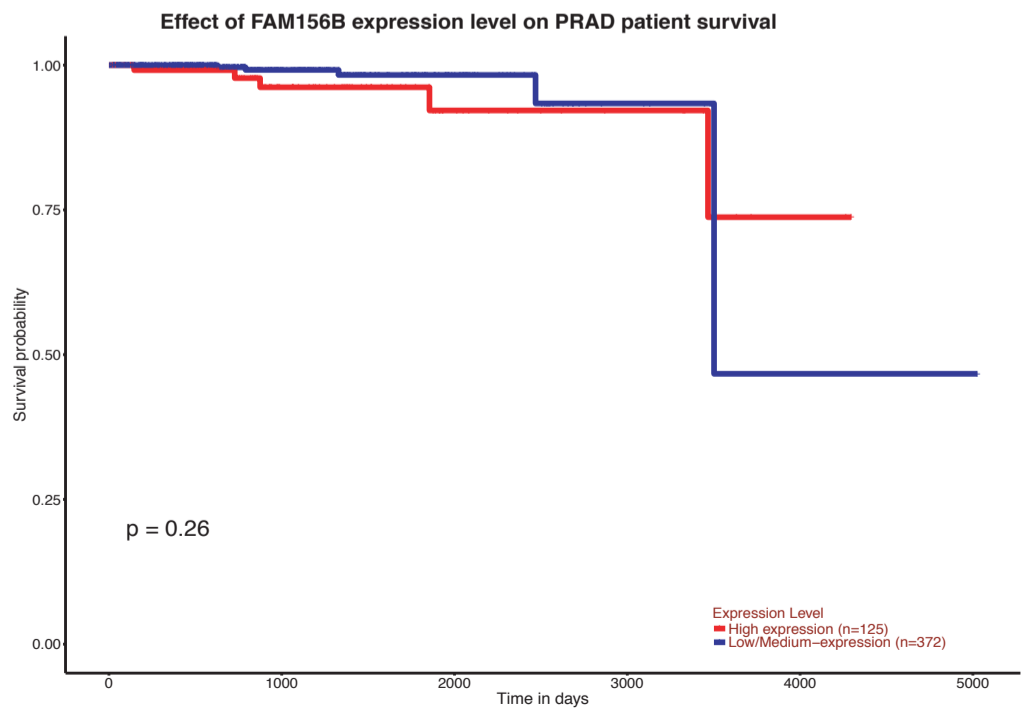

Supplement: JCMM-24-8006-s002.pdf [file JCMM-24-8006-s002.pdf]
